# Supplementary figures and images for: Changes in the Microbiome Profile in Different Parts of the Intestine in Piglets with Diarrhea
Source: MDPI journal article supplement (doi:10.3390/ani12030320), 2022-01-28

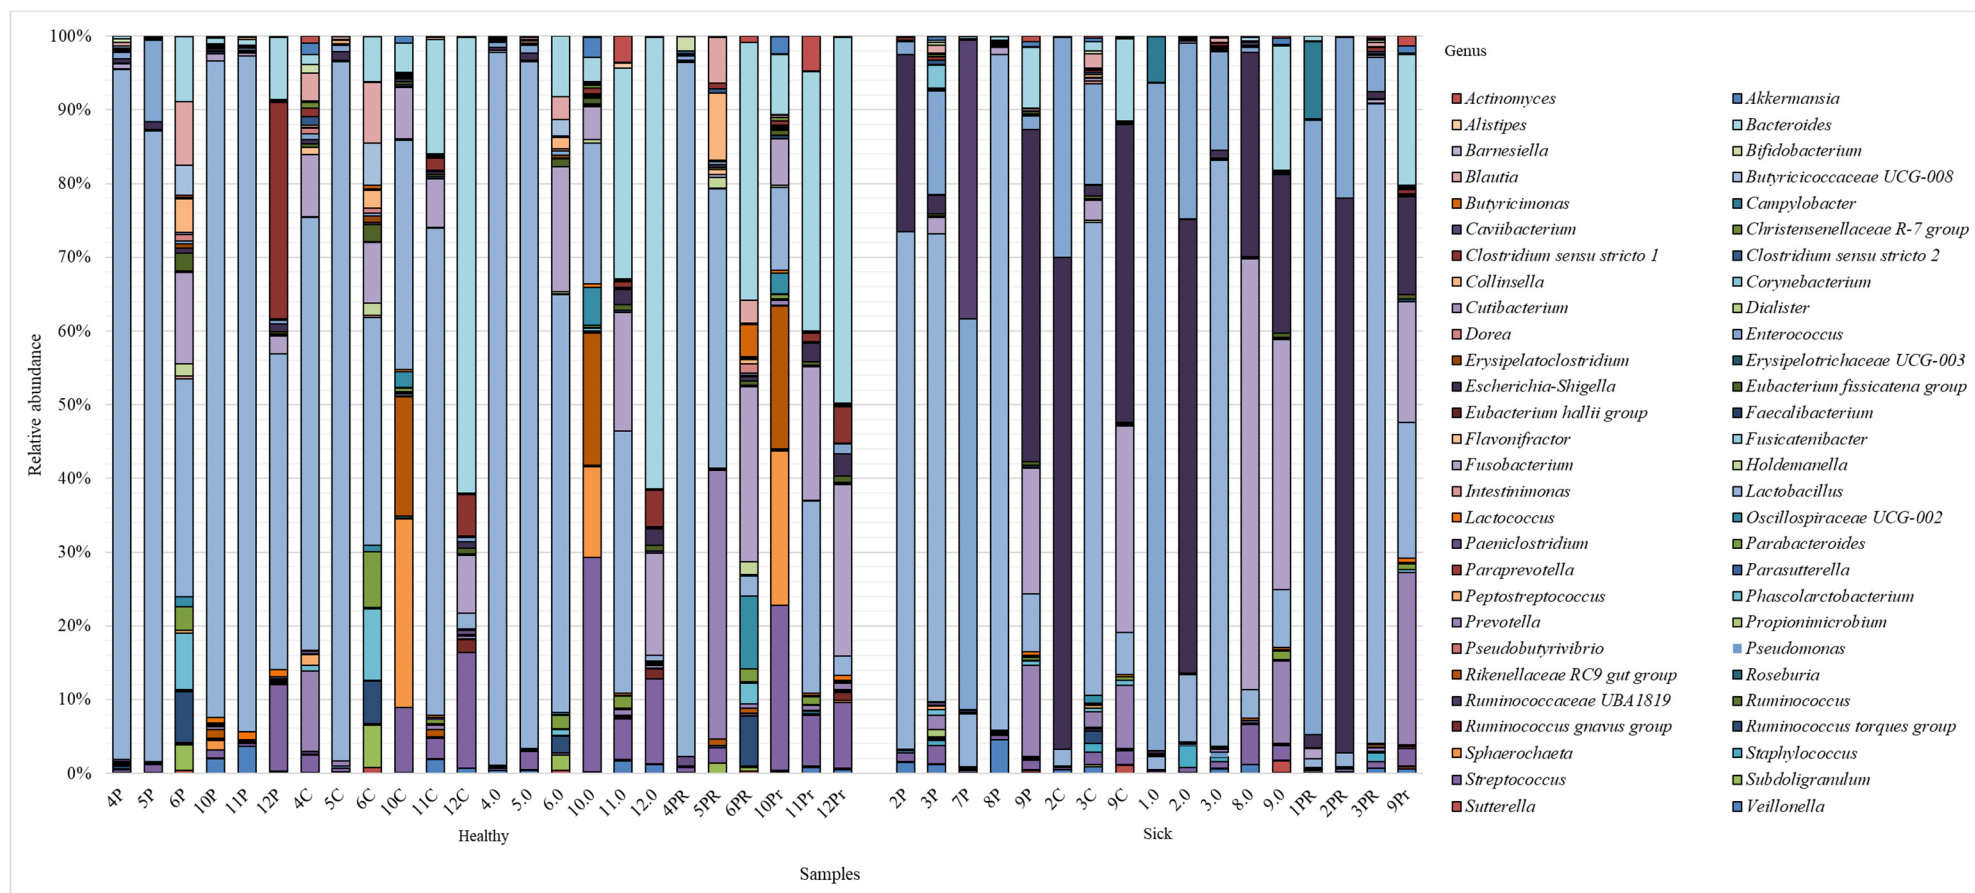

**Figure S1.** The abundance of microorganisms for the samples.

Supplement: s1 [file s1]
